# Supplementary material for: New Insights into the Crystal Chemistry of FeB-Type Compounds: The Case of CeGe
Source: MDPI journal article supplement (doi:10.3390/ma15249089), 2022-12-19
Supplement: s1 [file s1]

# New Insights into the Crystal Chemistry of FeB-Type Compounds: The Case of CeGe

Riccardo Freccero <sup>1,\*</sup>, Emmelina Frick <sup>2</sup>, Caroline Wilthorn <sup>2</sup> and Julia-Maria Hübner <sup>2,\*</sup>

<sup>1</sup> Dipartimento di Chimica e Chimica Industriale, Università degli Studi di Genova, Via Dodecaneso 31, I-16146 Genova, Italy

<sup>2</sup> Centre for Analysis and Synthesis, Lund University, Naturvetarvägen 14, 223 62 Lund, Sweden

\* Correspondence: riccardo.freccero@unige.it (R.F.); julia-maria.hubner@chem.lu.se (J.-M.H.)

## 1. Crystallographic Data from Powder X-ray Diffraction Data

**Table S1.** Comparison of lattice parameters of CeGe.

| Sample type    | $a / \text{\AA}$ | $b / \text{\AA}$ | $c / \text{\AA}$ | Reference                     | Contained Phases                                                                      |
|----------------|------------------|------------------|------------------|-------------------------------|---------------------------------------------------------------------------------------|
| Powder         | 8.354            | 4.082            | 6.033            | [1]                           |                                                                                       |
| Powder         | 8.337            | 4.061            | 6.045            | [2]                           |                                                                                       |
| Powder         | 8.355            | 4.078            | 6.023            | [3]                           |                                                                                       |
| Powder         | 8.3524(4)        | 4.0852(2)        | 6.0322(3)        | This work, 293 K (Figure S2)) | 82.9% CeGe,<br>1.7% Ge, 3.0% CeO <sub>2</sub> , 12.4% Ce <sub>5</sub> Ge <sub>4</sub> |
| Single crystal | 8.354(4)         | 4.073(2)         | 6.029(3)         | This work, 100 K              | CeGe                                                                                  |

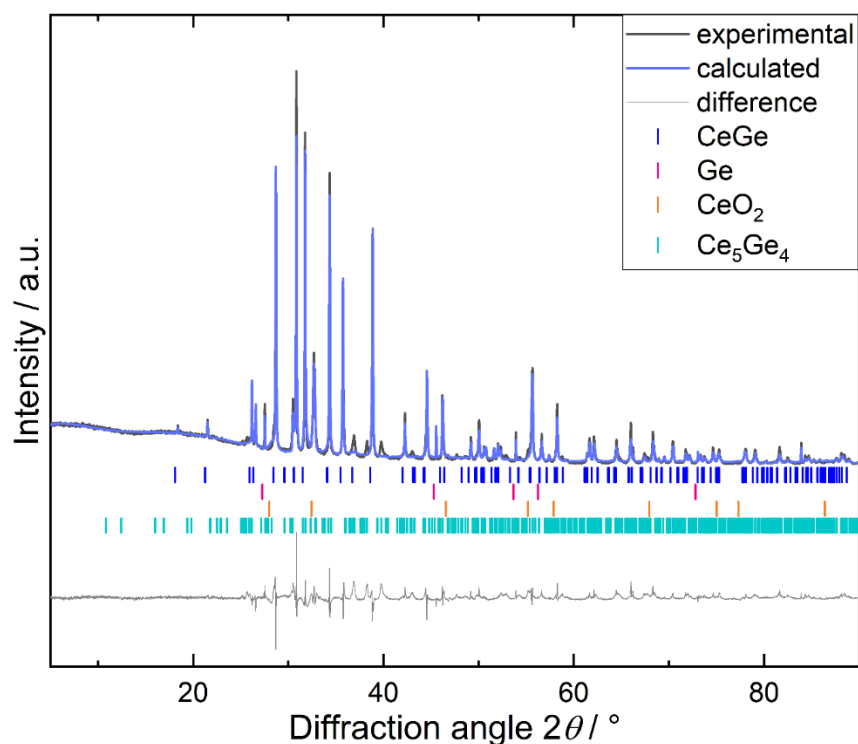

**Figure S1.** Powder diffraction pattern of one obtained sample.2. Crystallographic data from single crystal X-ray diffraction data.

## 2. Crystallographic data from single crystal X-ray diffraction data

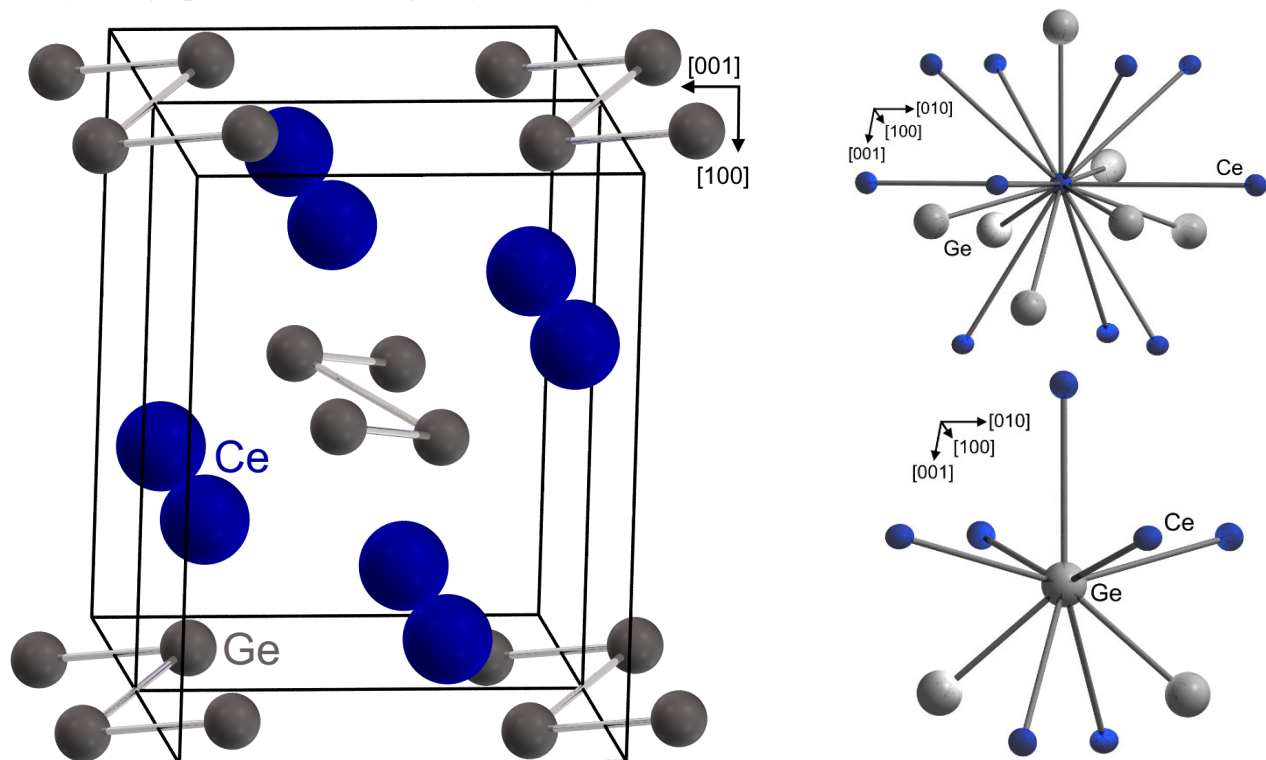

**Figure S2.** Crystal structure of CeGe. (left) Unit cell with Ge-chains running along [010] direction. (right) Coordination environment of Ce and Ge, respectively.

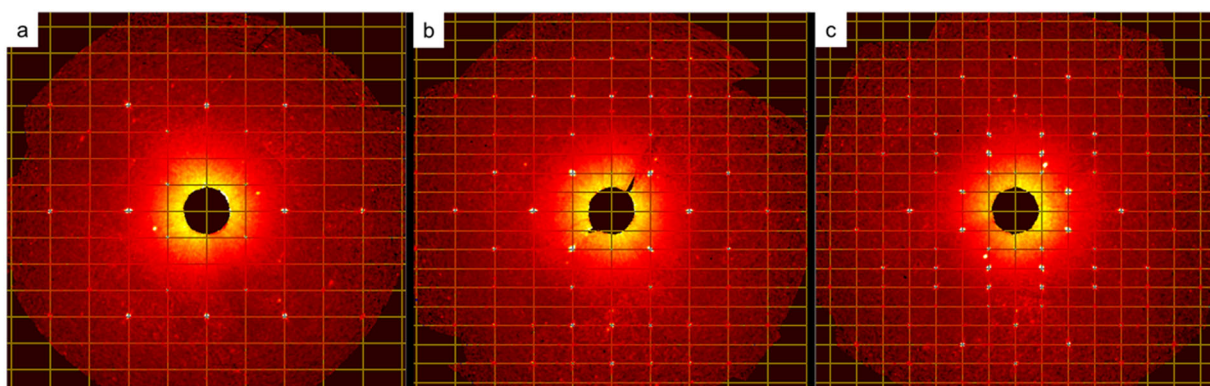

**Figure S3.** Diffraction pattern of CeGe with reciprocal lattice reconstructions of (a) ( $hk0$ ), (b) ( $h0l$ ), and (c) ( $0kl$ ) layers.

## 3. Thermal Analysis

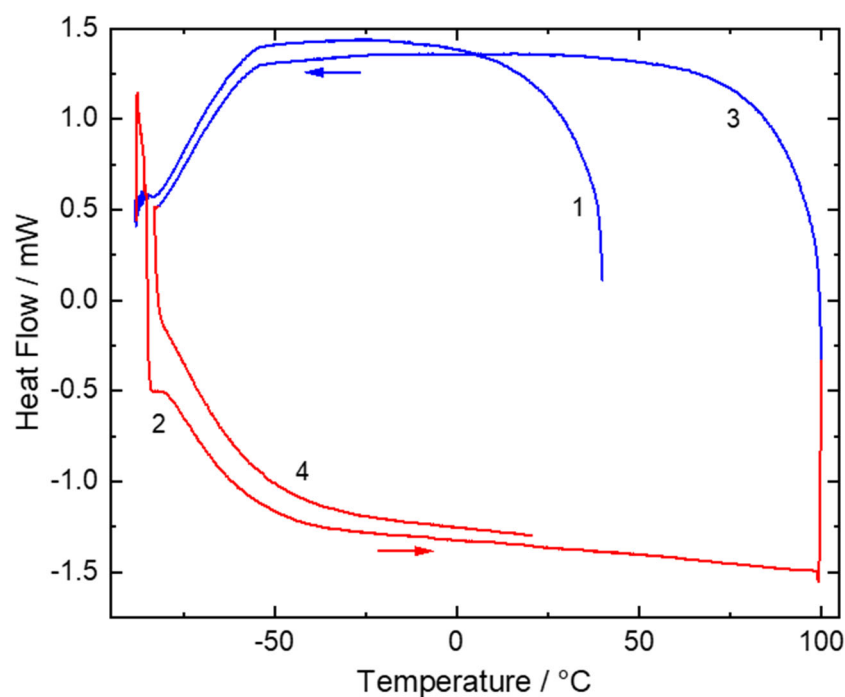

**Figure S4.** DSC, 1,3-first and second cooling, 2,4-first and second heating. Note the absence of any indication of a phase transformation in the interval measured.

#### 4. Distances in Ge-polyanionic Motifs

**Table S2.** Binary alkaline earth and rare earth metal germanides comprising Ge-polyanions. Average distances are given for chain motifs.

| Structure Type                  | Compound                        | Connectivity      | Structural Motif                            | Distance in Chain | Ref.      |
|---------------------------------|---------------------------------|-------------------|---------------------------------------------|-------------------|-----------|
| Ca <sub>7</sub> Sn <sub>6</sub> | Ca <sub>7</sub> Ge <sub>6</sub> | (1b); (1b) + (2b) | Two layer types: dumbbells; chain fragments | 2.549             | [4]       |
|                                 | Sr <sub>7</sub> Ge <sub>6</sub> |                   |                                             | 2.569             | [5]       |
|                                 | Ba <sub>7</sub> Ge <sub>6</sub> |                   |                                             | 2.571             | [5]       |
| CrB                             | CaGe                            | (2b)              | infinite trans-trans chains                 | 2.592             | [6]       |
|                                 | SrGe                            |                   |                                             | 2.622             | [7]       |
| SrSi                            |                                 | (1b)+(2b) + (3b)  | planar Si <sub>10</sub> units               | -                 | [8]       |
| CrB                             | BaGe                            | (2b)              | infinite trans-trans chains                 | 2.638             | [7]       |
| FeB                             | LaGe                            |                   |                                             | 2.667             | [9]       |
| LaSi                            |                                 | (2b)              | infinite cis-trans- cis-tans chains         | 2.621; 2.799      | [10]      |
| FeB                             | CeGe                            | (2b)              | infinite trans-trans chains                 | 2.674             | this work |
|                                 | PrGe                            |                   |                                             | 2.649             | [11]      |
|                                 |                                 |                   |                                             | 2.67              | [11]      |
| CrB                             | NdGe                            |                   |                                             | 2.711             | [11]      |
|                                 | SmGe                            |                   |                                             | 2.65              | [12]      |
|                                 | EuGe                            |                   |                                             | 2.60              | [13]      |
|                                 | GdGe                            |                   |                                             | 2.632             | [12]      |
|                                 | TbGe                            |                   |                                             | 2.666             | [14]      |
|                                 | DyGe                            |                   |                                             | 2.551             | [15]      |
|                                 | HoGe                            |                   |                                             | 2.639             | [16]      |
|                                 | ErGe                            |                   |                                             | 2.668             | [11]      |
| FeB                             | TmGe                            |                   |                                             | 2.571             | [17]      |
|                                 | LuGe                            |                   |                                             | 2.597             | [18]      |

|                                                                |                                 |                |                                                            |        |      |
|----------------------------------------------------------------|---------------------------------|----------------|------------------------------------------------------------|--------|------|
| Ba <sub>3</sub> Ge <sub>4</sub>                                | Ba <sub>3</sub> Ge <sub>4</sub> | (2b)+(3b)      | isolated butterflies +<br>trans-trans butterfly-<br>chains | 2.60   | [19] |
| Er <sub>3</sub> Ge <sub>4</sub>                                | Gd <sub>3</sub> Ge <sub>4</sub> | (1b) + (2b)    | chain fragments                                            | 2.632  | [20] |
| α-GdSi <sub>2-x</sub>                                          | LaGe <sub>1.6</sub>             | (3b)           | network                                                    | 2.449  | [21] |
| TbGe <sub>2</sub>                                              | TbGe <sub>2</sub>               | (2b)+(3b),(4b) | two layer types: zig-                                      | 2.446  | [22] |
| ZrSi <sub>2</sub> (-defect)                                    | TmGe <sub>2</sub>               | (2b),(4b)      | zag chains + Si <sub>4</sub> -                             | 2.544  | [23] |
|                                                                | LuGe <sub>2(-x)</sub>           |                | square nets                                                | 2.683  | [24] |
| Y <sub>3</sub> Ge <sub>5</sub>                                 | Y <sub>3</sub> Ge <sub>5</sub>  | (3b)           | interconnected chains                                      | 2.560  | [25] |
|                                                                | Sm <sub>3</sub> Ge <sub>5</sub> |                |                                                            | 2.556  | [26] |
| Y <sub>3</sub> Ge <sub>5</sub> -defect                         | Gd <sub>3</sub> Ge <sub>5</sub> |                |                                                            | 2.5625 | [26] |
|                                                                | Tb <sub>3</sub> Ge <sub>5</sub> |                |                                                            | 2.566  | [27] |
|                                                                | Ho <sub>3</sub> Ge <sub>5</sub> |                |                                                            | 2.546  | [28] |
| DyGe <sub>3</sub>                                              | YGe <sub>3</sub>                | (2b), (5b)     | two types of layers:<br>Chains + double<br>sheets          | 2.72   | [29] |
| DyGe <sub>3</sub> -defect                                      | PrGe <sub>3+x</sub>             |                |                                                            | 2.544  | [30] |
| ("Y(Ga <sub>0.13</sub> Ge <sub>0.87</sub> ) <sub>3.34</sub> ") | NdGe <sub>3+x</sub>             |                |                                                            | 2.575  | [30] |
|                                                                | TbGe <sub>3</sub>               |                |                                                            | 2.547  | [31] |
|                                                                | DyGe <sub>3</sub>               |                |                                                            | 2.505  | [32] |
| DyGe <sub>3</sub>                                              | HoGe <sub>3</sub>               |                |                                                            | 2.535  | [33] |
|                                                                | ErGe <sub>3</sub>               |                |                                                            | 2.579  | [34] |
|                                                                | TmGe <sub>3</sub>               |                |                                                            | 2.541  | [32] |
|                                                                | LuGe <sub>3</sub>               |                |                                                            | 2.585  | [35] |

## References

- Hohnke, D.; Parthe, E. AB compounds with Sc, Y and rare earth metals. II. FeB and CrB type structures of monosilicides and germanides. *Acta Crystallogr.* **1966**, 20(4), 572-582. <https://doi.org/10.1107/S0365110X66001282>
- Haschke, H.; Nowotny, H.; Benesovsky, F. Untersuchungen im System Cer-Silicium-Germanium. *Monatsh. Chem.* **1966**, 97(5), 1452-1458. <https://doi.org/10.1007/BF00902596>
- Das, P.K.; Kumar, N.; Kulkarni, R.; Dhar, S.K.; Thamizhavel, A. Anisotropic magnetic properties and superzone gap formation in CeGe single crystal. *J. Phys.: Condens. Matter*, **2012**, 24(14), 146003. <https://doi.org/10.1088/0953-8984/24/14/146003>
- Palenzona, A.; Manfrinetti, P.; Fornasini, M.L. The phase diagram of the Ca-Ge system. *J. Alloys Compd.* **2002**, 345, 144-147. [https://doi.org/10.1016/S0925-8388\(02\)00326-2](https://doi.org/10.1016/S0925-8388(02)00326-2)
- Siggelkow, L.; Hlukhyy, V.; Fässler, T.F. Sr<sub>7</sub>Ge<sub>6</sub>, Ba<sub>7</sub>Ge<sub>6</sub> and Ba<sub>3</sub>Sn<sub>2</sub> –Three new binary compounds containing dumbbells and four-membered chains of tetrel atoms with considerable Ge–Ge π-bonding character. *J. Solid State Chem.* **2012**, 191, 76-89. <https://doi.org/10.1016/j.jssc.2012.03.008>
- Eckerlin, B.; Meyer, H.J.; Woelfel, E. Die Kristallstruktur von CaSn and CaGe. *Z. Anorg. Allg. Chem.* **1955**, 281, 322-328. <https://doi.org/10.1002/zaac.19552810508>
- Rieger, W.; Parthe, E. Alkaline earth silicides, germanides and stannides with CrB structure type. *Acta Crystallogr.* **1967**, 22(6), 919-922. <https://doi.org/10.1107/S0365110X67001793>
- Eisenmann, B.; Schaefer, H.; Turban, K. On a new SrSi-modification and the new compound SrGe<sub>0.76</sub>. *Z. Naturforsch. B* **1974**, 29, 464-468. <https://doi.org/10.1515/znB-1974-7-803>
- Duerr, I.; Bauer, B.; Roehr, C. Lanthan-Triell/Tetrel-ide La (Al, Ga)(x) (Si, Ge)(1-x). Experimentelle und theoretische Studien zur Stabilität polarer 1:1-Phasen. *Z. Naturforsch. B* **2011**, 66(11), 1107-1121. <https://doi.org/10.1515/znB-2011-1105>
- Mattausch, H.J.; Oeckler, O.; Simon, A. Eine neue Modifikation von Lanthanmonosilicid -IT-LaSi. *Z. Anorg. Allg. Chem.* **1999**, 625, 1151-1154. [https://doi.org/10.1002/\(SICI\)1521-3749\(199907\)625:7<1151::AID-ZAAC1151>3.0.CO;2-4](https://doi.org/10.1002/(SICI)1521-3749(199907)625:7<1151::AID-ZAAC1151>3.0.CO;2-4)
- Schobinger Papamantellos, P.; Buschow, K.H.J. Ferromagnetism of NdGe and PrGe studied by neutron diffraction and magnetic measurements. *J. Less Common Met.* **1985**, 111, 125-138. [https://doi.org/10.1016/0022-5088\(85\)90178-X](https://doi.org/10.1016/0022-5088(85)90178-X)

12. Tharp, A.G.; Smith, G. S.; Johnson, Q. Structures of the rare earth germanides at or near equiatomic proportions. *Acta Crystallogr.* **1966**, *20*(4), 583-585. <https://doi.org/10.1107/S0365110X66001294>
13. Merlo F. Fornasini M.L. CrB-type equiatomic compounds of europium, ytterbium and alkaline-earth metals with Si, Ge, Sn, Pb. *J. Less-Common Met.* **1967**, *13*, 603-610. [https://doi.org/10.1016/0022-5088\(67\)90105-1](https://doi.org/10.1016/0022-5088(67)90105-1)
14. Schobinger Papamantellos P. Buschow K.H.J. A neutron diffraction and magnetic study of the first-order phase transition in  $\text{TbGe}_{1-x}\text{Si}_x$  ( $0 = x = 0.4$ ). *J. Magn. Magn. Mater.* **1986**, *62*, 15-28. [https://doi.org/10.1016/0304-8853\(86\)90729-8](https://doi.org/10.1016/0304-8853(86)90729-8)
15. Buschow K.H.J. Schobinger Papamantellos P. Fischer P. Magnetic structure and properties of equiatomic rare earth germanides. *J. Less-Common Met.* **1988**, *139*, 221-231. [https://doi.org/10.1016/0022-5088\(88\)90003-3](https://doi.org/10.1016/0022-5088(88)90003-3)
16. Schobinger Papamantellos, P.; Buschow, K.H.J. Magnetic structure and incommensurate phase transition in HoGe. *J. Magn. Magn. Mater.* **1984**, *44*, 149-157. [https://doi.org/10.1016/0304-8853\(84\)90058-1](https://doi.org/10.1016/0304-8853(84)90058-1)
17. Eremenko, V.N.; Meleshevich, K.A.; Buyanov, Yu.I.; Martsenyuk, P.S. Structure of the alloys and phase diagram of the thulium-germanium system. *Powder Metall. Met. Ceram.* **1989**, *28*, (7) 543-547. <https://doi.org/10.1007/BF00794867>
18. Freccero, R.; Hübner, J.-M.; Prots, Y.; Schnelle, W.; Schmidt, M.; Wagner, F. R.; Schwarz, U.; Grin, Y. "Excess" electrons in LuGe. *Angew. Chem. Int. Ed.* **2021**, *60*, 6457. <https://doi.org/10.1002/anie.202014284>
19. Zürcher, F.; Nesper, R.  $\text{Ba}_3\text{Ge}_4$ : Polymerization of Zintl Anions in the Solid and Bond Stretching Isomerism. *Angew. Chem.* **1998**, *37* (23), 3314-3318. [https://doi.org/10.1002/\(SICI\)1521-3773\(19981217\)37:23<3314::AID-ANIE3314>3.0.CO;2-L](https://doi.org/10.1002/(SICI)1521-3773(19981217)37:23<3314::AID-ANIE3314>3.0.CO;2-L)
20. Tobash, P. H.; DiFilippo, G.; Bobev, S.; Hur, N.; Thompson, J. D.; Sarrao, J. L. Structure and properties of  $\text{Gd}_3\text{Ge}_4$ : the orthorhombic  $\text{RE}_3\text{Ge}_4$  structures revisited ( $\text{RE} = \text{Y}, \text{Tb-Tm}$ ). *Inorg. Chem.* **2007**, *46*, 8690– 8697. <https://doi.org/10.1021/ic7009034>
21. Guloy, A.M.; Corbett, J.D. Syntheses and structures of lanthanum germanide,  $\text{LaGe}_{2-x}$ , and lanthanum aluminum germanide,  $\text{LaAlGe}$ : interrelationships among the  $\alpha\text{-ThSi}_2$ ,  $\alpha\text{-GdSi}_2$ , and  $\text{LaPtSi}$  structure types. *Inorg. Chem.* **1991**, *30*, 4789-4794. <https://doi.org/10.1021/ic00025a021>
22. Schobinger Papamantellos, P.; de Mooij, D.B.; Buschow, K.H.J. Crystallographic and magnetic structure of  $\text{TbGe}_2$ . *J. Less Common Met.* **1988**, *144*, 265-274. [https://doi.org/10.1016/0022-5088\(88\)90140-3](https://doi.org/10.1016/0022-5088(88)90140-3)
23. Tobash, P.H.; Meyers, J.J.; DiFilippo, G.; Bobev, S.; Ronning, F.; Thompson, J.D.; Sarrao, J.L. Structure and properties of a new family of nearly equiatomic rare-earth metal-tin-germanides  $\text{RESn}_{1-x}\text{Ge}_{1-x}$  ( $\text{RE} = \text{Y}, \text{Gd-Tm}$ ): an unusual example of site preferences between elements from the same group. *Chem. Mater.* **2008**, *20* (6), 2151-2159. <https://doi.org/10.1021/cm7033799>
24. Francois, M.; Venturini, G.; Malaman, B.; Roques, B. Nouveaux isotypes de  $\text{CeNiSi}_2$  dans les systemes  $\text{R-M-X}$  ( $\text{R}$  ident to  $\text{La-Lu}$ ,  $\text{M}$  ident to metaux des groupes 7 A 11 et  $\text{X}$  ident to  $\text{Ge, Sn}$ ). I compositions et parametres cristallins *J. Less Common Met.* **1990**, *160*, (2), 197-213. [https://doi.org/10.1016/0022-5088\(90\)90381-S](https://doi.org/10.1016/0022-5088(90)90381-S)
25. Bruskov, V. A.; Bodak, O. I.; Pecharskii, V. K.; Gladyshevskii, E. I.; Muratova, L. A. Crystal structure of  $\text{Y}_3\text{Ge}_5$  ("YGe<sub>1.7</sub>"). *Kristallografiya* **1983**, *28* (2), 260– 263.
26. Tobash, P.H.; Lins, D.; Bobev, S.; Hur, N.; Thompson, J.D. Sarrao, J.L. Vacancy Ordering in  $\text{SmGe}_{2-x}$  and  $\text{GdGe}_{2-x}$  ( $x = 0.33$ ): Structure and Properties of Two  $\text{Sm}_3\text{Ge}_5$  Polymorphs and of  $\text{Gd}_3\text{Ge}_5$ . *Inorg. Chem.* **2006**, *45*, 7286-7294. <https://doi.org/10.1021/ic060913f>
27. Schobinger-Papamantellos, P.; de Mooij, D.B. Buschow, K.H.J. Crystallographic and magnetic structure of  $\text{Dy}_3\text{Ge}_5$  and  $\text{DyGe}_{1.9}$ . *J. Less-Common Met.* **1990**, *163*, 319-330. [https://doi.org/10.1016/0022-5088\(90\)90598-E](https://doi.org/10.1016/0022-5088(90)90598-E)
28. Zaharko, O.; Schobinger Papamantellos, P.; Ritter, C. Antiferromagnetic ordering in the novel  $\text{Ho}_3\text{Ge}_5$  and  $\text{HoGe}_{1.85}$  compounds studied by X-ray and neutron diffraction. *J. Alloys Compd.* **1998**, *280*, 4-15.
29. Belyavina, N. M.; Markiv, V. Ya.; Speka, M. V. Crystal structure of  $\text{YGe}_3$ ,  $\text{YGe}_{1.9}$  and a novel  $\text{Y}_3\text{Ge}_4$  compound. *J. Alloys Compd.* **1999**, *283*, 162– 168, [https://doi.org/10.1016/S0925-8388\(98\)00858-5](https://doi.org/10.1016/S0925-8388(98)00858-5)
30. Fukuoka, H.; Yoshikawa, M.; Baba, K.; Yamanaka, S. Preparation and Structures of Lanthanoid Germanides,  $\text{PrGe}_{3.36}$ ,  $\text{NdGe}_{3.25}$ , and  $\text{TmGe}_3$  with Double Square Ge-Mesh Structures. *Bull. Chem. Soc. Jpn.* **2010**, *83*, 323–327. <https://doi.org/10.1246/bcsj.20090310>
31. Schobinger-Papamantellos, P., Andre, G., Rodriguez-Carvajal, J., de Groot, C.H., Boer, F.R de and Buschow, K.H.J. The magnetic ordering of the novel compound  $\text{TbGe}_3$ . *J. Alloys and Compd.* **1996**, *232*, 165-168.

32. Schobinger-Papamantellos, P.; de Mooij, D. B.; Buschow, K. H. J. Crystal structure of the compound DyGe<sub>3</sub>. *J. Alloys Compd.* **1992**, *183*, 181–186. [https://doi.org/10.1016/0925-8388\(92\)90743-S](https://doi.org/10.1016/0925-8388(92)90743-S)
33. Schobinger-Papamantellos, P.; Rodriguez Carvajal, J.; Tung, L.D.; Ritter, C.; Buschow, K.H.J. Competing multiple-q magnetic structures in HoGe<sub>3</sub>: I. The magnetic phase diagram of HoGe<sub>3</sub>. *J. Phys. Condens. Matter* **2008**, *20*, 195201. <https://doi.org/10.1088/0953-8984/20/19/195201>
34. Eremenko, V.N.; Obushenko, I.M. Phase Diagram of the Erbium-Germanium System. *Sov. Non-Ferrous Met. Res.* **1981**, *9*, 216–220.
35. Hübner, J.-M.; Bobnar, M.; Akselrud, L.; Prots, Y.; Grin, Y.; Schwarz, U. Lutetium Trigermanide LuGe<sub>3</sub>: High-Pressure Synthesis, Superconductivity, and Chemical Bonding. *Inorg. Chem.* **2018**, *57*, 10295–10302. <https://doi.org/10.1021/acs.inorgchem.8b01510>
